# Supplementary material for: Chemical Epigenetic Regulation Secondary Metabolites Derived from Aspergillus sydowii DL1045 with Inhibitory Activities for Protein Tyrosine Phosphatases
Source: MDPI journal article supplement (doi:10.3390/molecules29030670), 2024-01-31
Supplement: s1 [file s1]

# Chemical Epigenetic Regulation Secondary Metabolites Derived from *Aspergillus sydowii* DL1045 with Inhibitory Activities for Protein Tyrosine Phosphatases

Xuan Shi <sup>1</sup>, Xia Li <sup>1</sup>, Xiaoshi He <sup>1</sup>, Danyang Zhang <sup>1</sup>, Chunshan Quan <sup>2</sup>, Zhilong Xiu <sup>1</sup>  
and Yuesheng Dong <sup>1,\*</sup>

<sup>1</sup> School of Bioengineering, Dalian University of Technology, Dalian 116024, China

<sup>2</sup> College of Life Science, Dalian Minzu University, Dalian 116600, China

\* Correspondence: yshdong@dlut.edu.cn.

## Supplementary Information

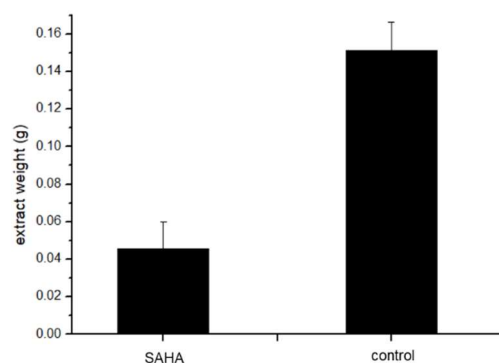

Figure S1. The weight of metabolite ethyl acetate extract in SAHA group and control after 10 days.

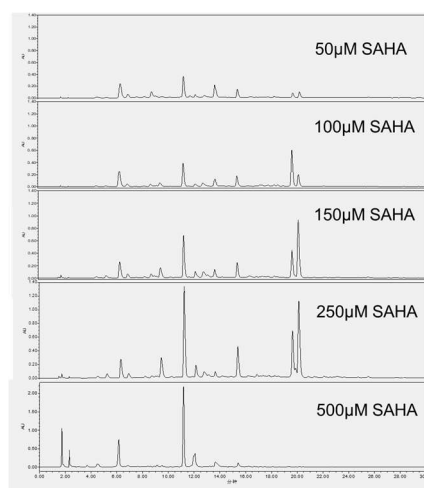

Figure S2. The effects of SAHA concentrations on the metabolites after 10 days.

Table S1 The characteristics of increased and decreased in abundance following SAHA treatment, respectively.

| Increased |          |          | Decreased |          |          |
|-----------|----------|----------|-----------|----------|----------|
| NO.       | RT (min) | m/z      | NO.       | RT (min) | m/z      |
| 345       | 22.103   | 252.1897 | 94        | 13.983   | 179.1426 |
| 523       | 13.937   | 287.1359 | 151       | 13.923   | 197.1533 |
| 673       | 22.451   | 329.1016 | 419       | 16.311   | 259.0596 |
| 735       | 22.657   | 347.1132 | 652       | 21.543   | 321.1666 |
| 217       | 30.554   | 227.1464 | 745       | 16.224   | 356.1372 |
| 211       | 24.274   | 247.2303 | 767       | 22.169   | 365.2776 |
| 323       | 21.623   | 239.1654 | 784       | 14.177   | 375.1062 |
| 483       | 14.933   | 271.1407 | 805       | 15.749   | 386.2445 |
| 360       | 21.503   | 250.1442 | 853       | 19.72    | 409.2547 |
| 1073      | 16.14    | 481.1871 | 1065      | 13.555   | 479.2311 |
| 868       | 26.762   | 415.2116 | 1099      | 27.056   | 490.3685 |
| 104       | 11.745   | 181.1227 | 1293      | 19.012   | 583.313  |
| 70        | 7.222    | 169.0498 | 1298      | 19.249   | 601.3374 |
| 108       | 13.67    | 182.0815 | 1321      | 16.131   | 857.3807 |

|      |        |          |      |        |          |
|------|--------|----------|------|--------|----------|
| 236  | 14.808 | 222.1128 | 615  | 20.775 | 305.1726 |
| 522  | 18.122 | 282.1701 | 613  | 20.308 | 305.1726 |
| 175  | 3.57   | 206.0451 | 1244 | 12.275 | 541.3399 |
| 359  | 19.571 | 250.1442 | 1296 | 13.147 | 599.3814 |
| 460  | 11.393 | 267.1225 | 169  | 15.758 | 203.143  |
| 458  | 12.581 | 266.175  | 623  | 15.543 | 309.13   |
| 1069 | 13.584 | 481.1871 | 790  | 29.649 | 377.2286 |
| 99   | 14.268 | 181.1218 | 1303 | 13.403 | 643.4067 |
| 936  | 18.696 | 439.1736 | 1054 | 24.317 | 477.0823 |
| 1310 | 16.225 | 667.3031 | 87   | 13.339 | 177.1271 |
| 79   | 6.957  | 171.0647 | 1301 | 13.276 | 621.3911 |
| 525  | 14.312 | 283.118  | 1199 | 12.117 | 519.3232 |
| 443  | 11.221 | 265.1542 | 588  | 11.837 | 301.0697 |
| 777  | 26.796 | 369.2634 | 424  | 20.223 | 261.1484 |
| 161  | 11.123 | 201.1118 | 578  | 11.672 | 299.0529 |
| 572  | 9.928  | 296.1493 | 188  | 8.047  | 211.0605 |
| 472  | 4.383  | 268.1033 | 93   | 13.544 | 179.1426 |
|      |        |          | 1320 | 16.169 | 835.4006 |
|      |        |          | 659  | 29.649 | 323.2225 |
|      |        |          | 559  | 16.764 | 291.0859 |
|      |        |          | 219  | 8.94   | 218.1035 |
|      |        |          | 716  | 17.468 | 345.0602 |
|      |        |          | 1214 | 18.559 | 525.3078 |
|      |        |          | 519  | 21.486 | 281.1754 |
|      |        |          | 582  | 21.514 | 299.1857 |
|      |        |          | 846  | 21.399 | 406.3517 |
|      |        |          | 444  | 10.737 | 265.1542 |
|      |        |          | 873  | 28.803 | 415.2691 |
|      |        |          | 268  | 7.005  | 231.0864 |

20180801-SX-45RSS-A3-POS-#5 RT: 0.05 AV: 1 NL: 2.26E6  
T: FTMS +p ESI Full ms [120.00-1000.00]

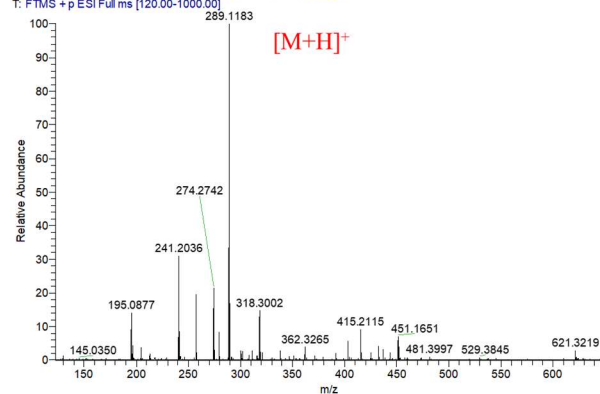

20180801-SX-45RSS-A3-NEG #22 RT: 0.17 AV: 1 NL: 2.63E6  
T: FTMS -p ESI Full ms [120.00-1000.00]

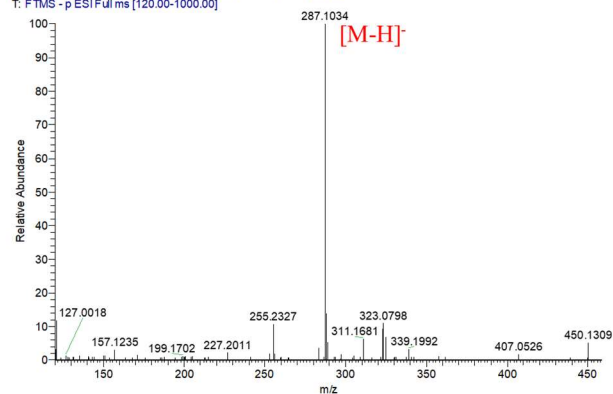

Figure S3 Positive and negative HRESIMS spectrum of sydowimide A (A11).

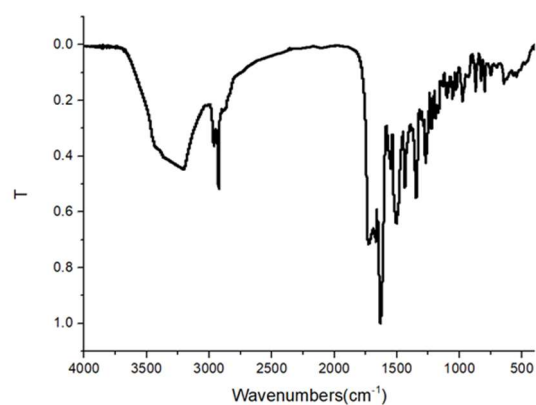

Figure S4 IR spectrum of sydowimide A (A11).

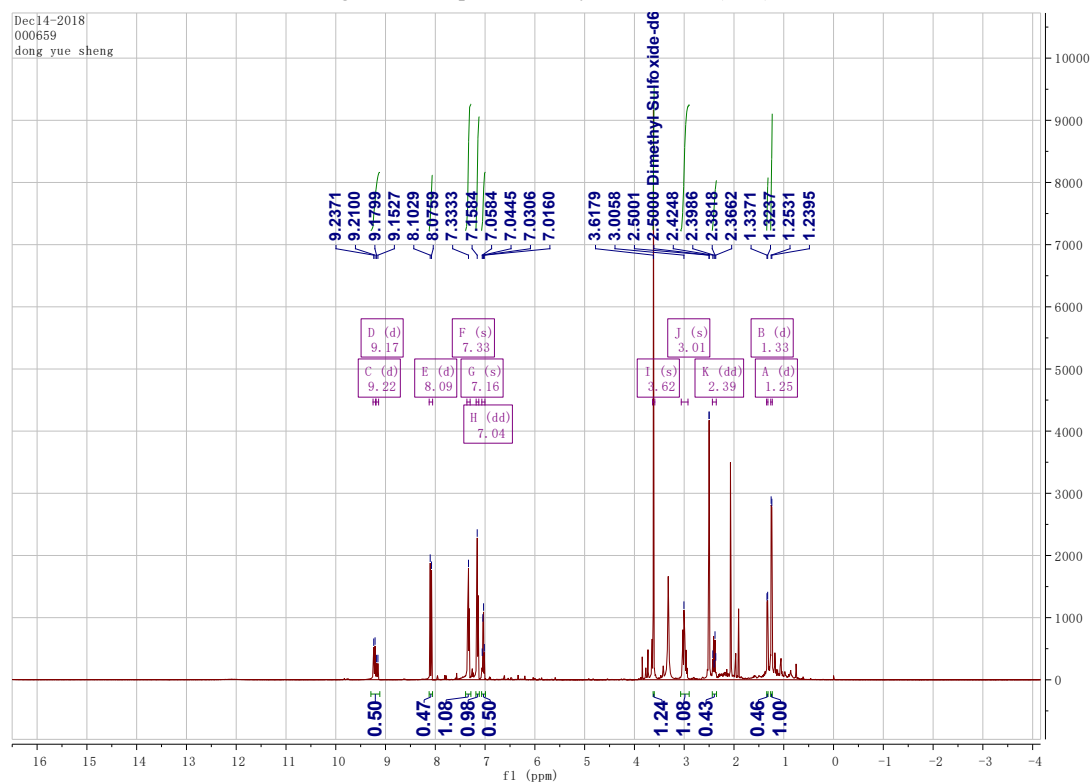

Figure S5 <sup>1</sup>H NMR (500 MHz, DMSO-*d*<sub>6</sub>) spectrum of sydowimide A (A11).

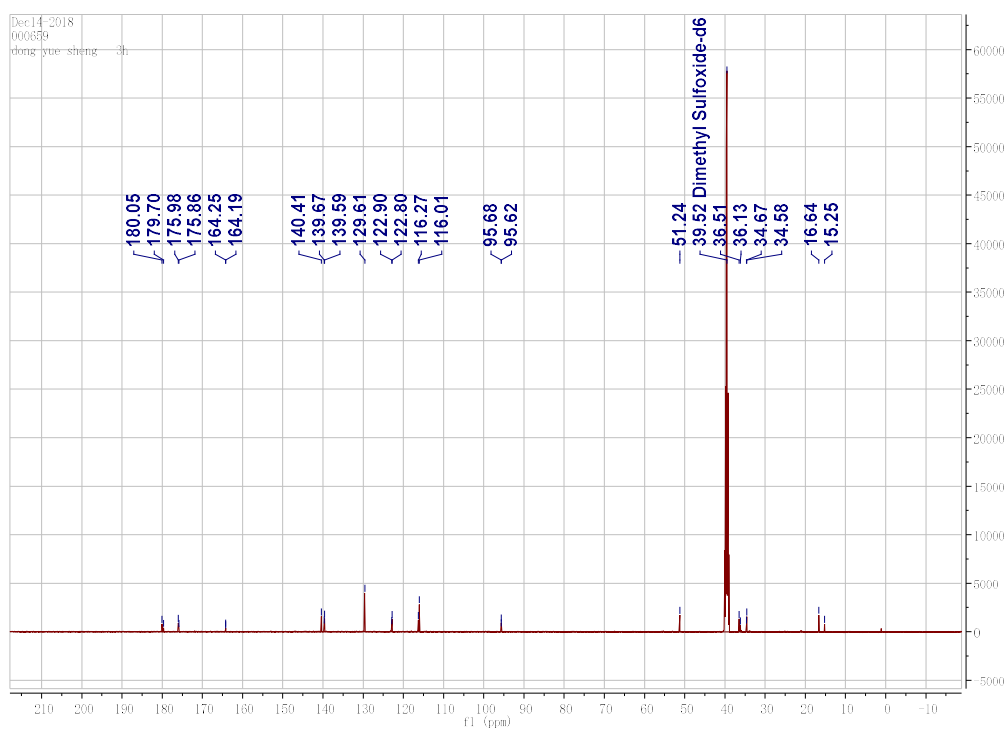

Figure S6 <sup>13</sup>C NMR (250 MHz, DMSO-*d*<sub>6</sub>) spectra of sydowimide A (A11).

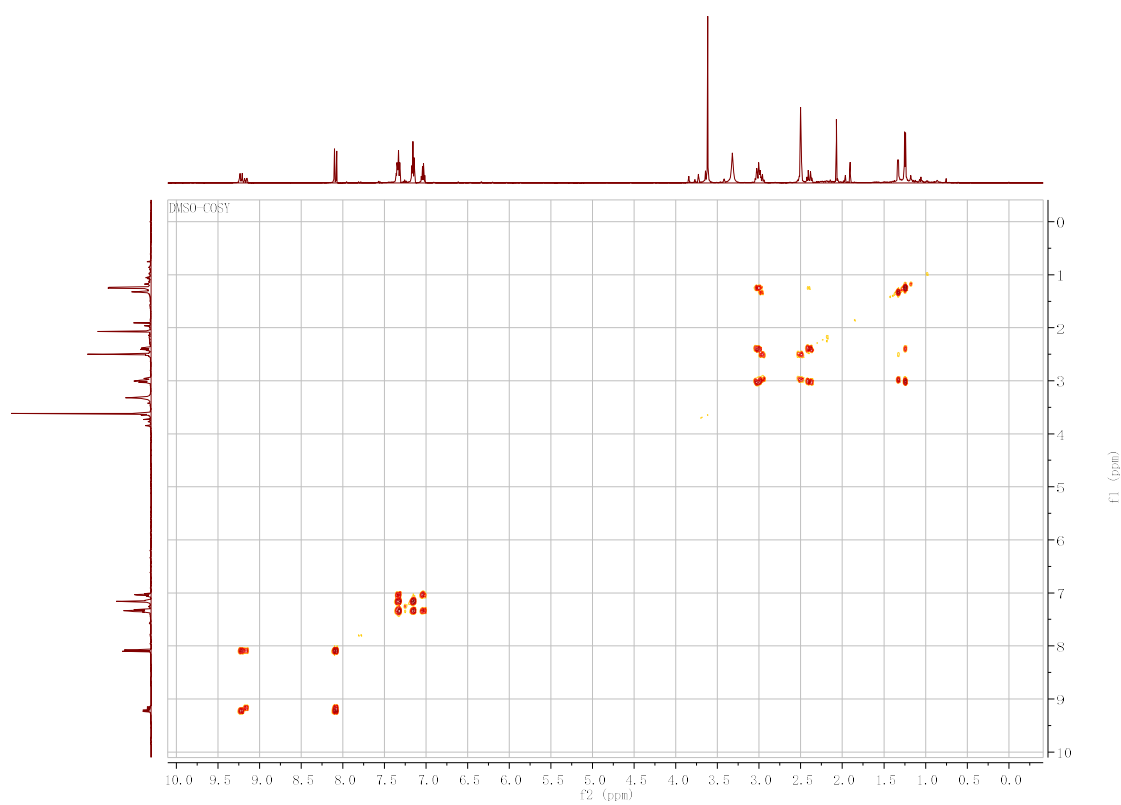

Figure S7 H-H COSY spectrum of sydowimide A (A11).

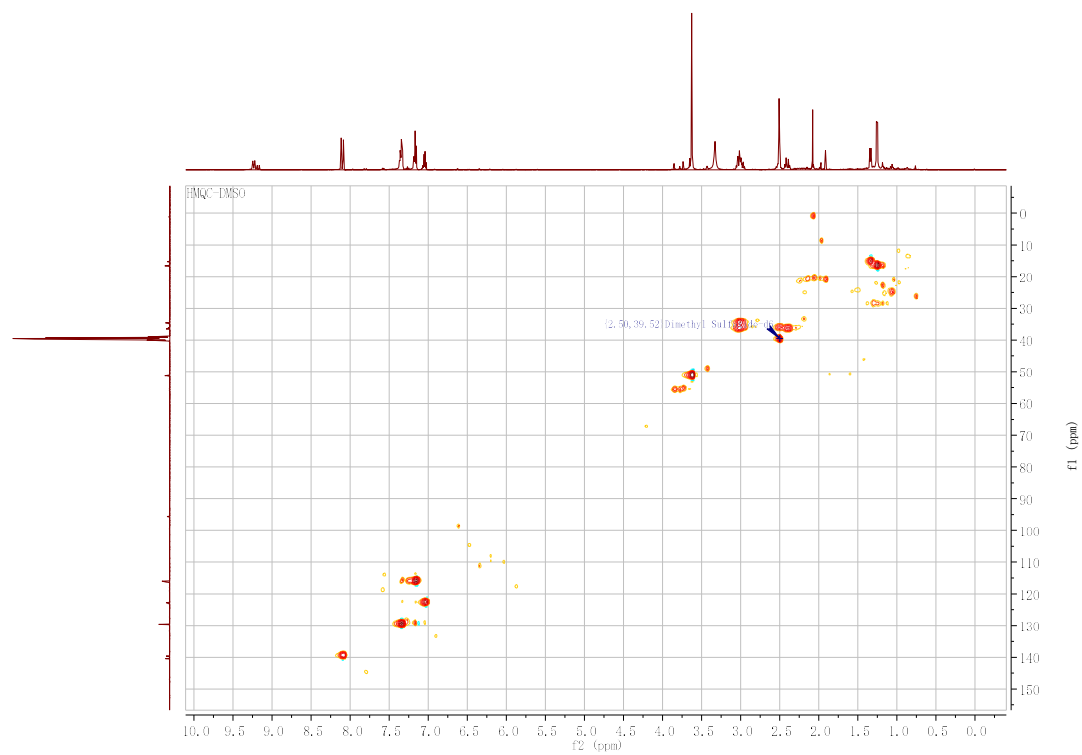

Figure S8 HMQC spectrum of sydowimide A (A11).

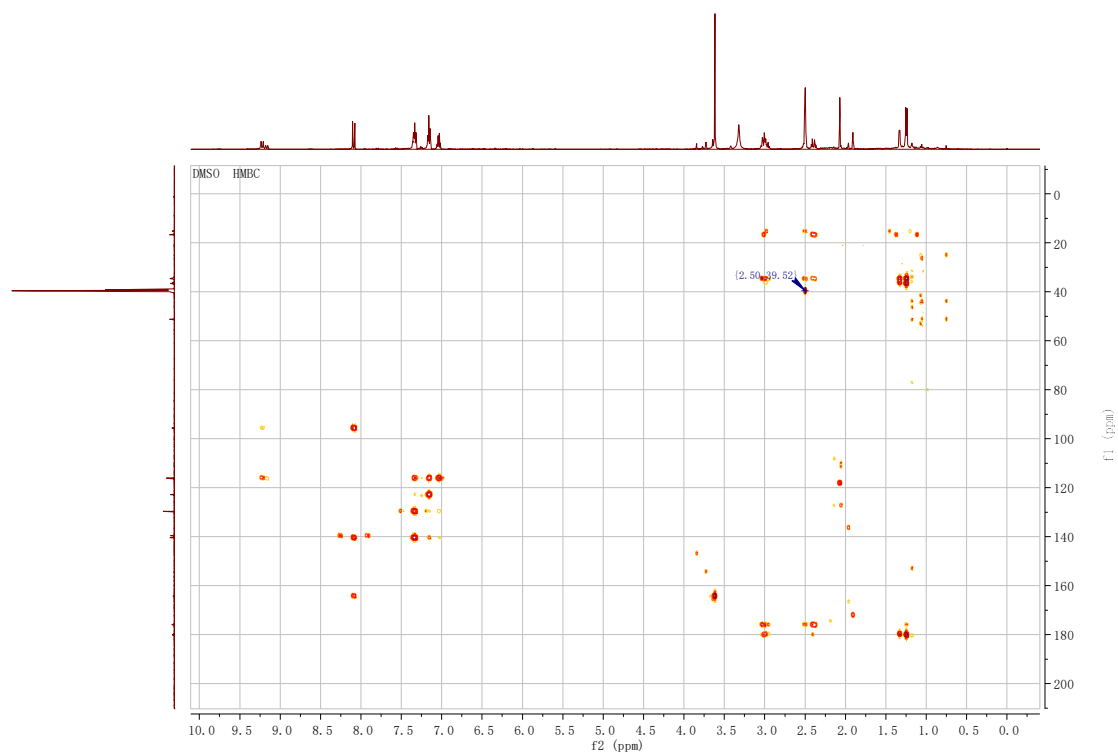

Figure S9 HMBC spectrum of sydowimide A (A11).

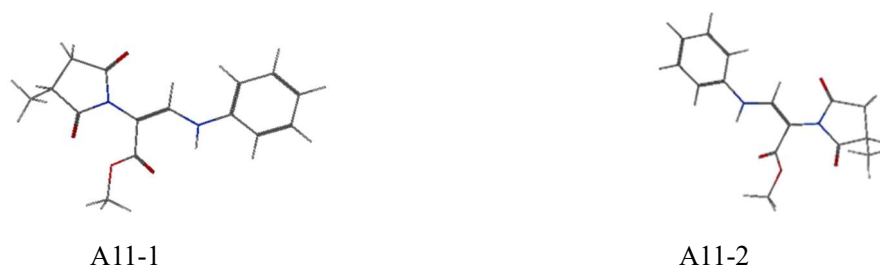

Figure S10 Optimized conformers ( $\geq 1\%$ ) of sydowimide A (**A11**) at the B3LYP/6-31+G (d) level with PCM model in MeOH.

Table S2. Important Thermodynamic Parameters and Conformational Analysis of sydowimide A (**A11**).

| Conformations | E+ZPE       | G           | P      |
|---------------|-------------|-------------|--------|
| A11-1         | -934.969575 | -934.988547 | 88.40% |
| A11-2         | -934.969575 | -934.969575 | 11.60% |

E+ZPE: total energy with zero point energy; G: Gibbs free energy; P: conformational distributions calculated from relative Gibbs free energy.

Table S3. Optimized Cartesian Coordinate of compound sydowimide A (**A11**) at B3LYP/6-31G (d, p) level in MeOH

Using the PCM Model

| No. | Atom | A11-1     |           |           | A11-2     |           |           |
|-----|------|-----------|-----------|-----------|-----------|-----------|-----------|
|     |      | X         | Y         | Z         | X         | Y         | Z         |
| 1   | C    | 3.48927   | -1.836175 | -0.448678 | -3.489249 | -1.836203 | -0.448649 |
| 2   | C    | 2.327212  | -0.974381 | -0.937563 | -2.327184 | -0.974428 | -0.937549 |
| 3   | C    | 3.525053  | -1.593984 | 1.071801  | -3.525079 | -1.593925 | 1.071814  |
| 4   | C    | -5.861346 | -1.002806 | -0.100224 | 5.861338  | -1.00282  | -0.100218 |
| 5   | C    | 4.788267  | -1.530869 | -1.201271 | -4.788229 | -1.530954 | -1.201296 |
| 6   | C    | -4.808635 | -1.869073 | 0.203436  | 5.582963  | 0.338967  | -0.371933 |
| 7   | C    | 2.267896  | -0.803897 | 1.393106  | -2.267928 | -0.803829 | 1.393112  |
| 8   | C    | -5.58297  | 0.338991  | -0.371885 | 4.808628  | -1.869068 | 0.203502  |
| 9   | C    | -4.271129 | 0.807186  | -0.348278 | 3.491336  | -1.411905 | 0.237458  |
| 10  | C    | 0.498134  | 0.367853  | 0.090751  | -0.498135 | 0.367861  | 0.090753  |
| 11  | C    | 2.24237   | 3.590832  | 0.017888  | -2.24237  | 3.590841  | 0.017823  |

---

|    |   |           |           |           |           |           |           |
|----|---|-----------|-----------|-----------|-----------|-----------|-----------|
| 12 | C | -3.491339 | -1.411919 | 0.237384  | 4.271126  | 0.807169  | -0.34832  |
| 13 | C | -3.21431  | -0.066379 | -0.047152 | 3.214307  | -0.066376 | -0.047133 |
| 14 | C | 0.690231  | 1.808817  | 0.025823  | -0.690233 | 1.808825  | 0.025802  |
| 15 | C | -0.749208 | -0.205417 | 0.060562  | 0.749207  | -0.205409 | 0.060585  |
| 16 | H | 5.582973  | -2.211445 | -0.880321 | -5.582942 | -2.211506 | -0.88031  |
| 17 | H | -6.883883 | -1.367445 | -0.120581 | 6.883872  | -1.367465 | -0.120581 |
| 18 | H | 5.119597  | -0.503797 | -1.011463 | -5.119565 | -0.503867 | -1.011577 |
| 19 | H | 3.55098   | -2.509968 | 1.668002  | -3.551037 | -2.509872 | 1.66807   |
| 20 | H | -6.388775 | 1.028563  | -0.607082 | 5.00928   | -2.9134   | 0.425723  |
| 21 | H | -0.813437 | -1.286687 | 0.111117  | 0.813439  | -1.286677 | 0.111212  |
| 22 | H | 4.3892    | -0.988006 | 1.369645  | -4.389231 | -0.987924 | 1.369595  |
| 23 | H | -4.059142 | 1.850543  | -0.567208 | 2.697447  | -2.103722 | 0.497546  |
| 24 | H | -2.69745  | -2.103754 | 0.497421  | 4.059139  | 1.850518  | -0.567293 |
| 25 | H | -1.80505  | 1.479542  | -0.114618 | 1.805051  | 1.479548  | -0.11462  |
| 26 | H | 4.642736  | -1.651487 | -2.278639 | -4.642675 | -1.651657 | -2.278652 |
| 27 | H | 1.864268  | 4.009979  | -0.917749 | -1.864272 | 4.00997   | -0.917824 |
| 28 | H | 1.770553  | 4.101146  | 0.861138  | -3.326108 | 3.691248  | 0.069832  |
| 29 | H | 3.198407  | -2.875032 | -0.652876 | -3.198373 | -2.875069 | -0.652783 |
| 30 | H | 3.326108  | 3.691239  | 0.069895  | -1.770549 | 4.101168  | 0.861062  |
| 31 | H | -5.009288 | -2.913414 | 0.425613  | 6.388767  | 1.028523  | -0.607177 |
| 32 | N | -1.910939 | 0.467449  | -0.036523 | 1.91094   | 0.467457  | -0.036496 |
| 33 | N | 1.638334  | -0.484239 | 0.180903  | -1.638336 | -0.484228 | 0.180911  |
| 34 | O | 1.986766  | 2.17542   | 0.077067  | -1.986767 | 2.175428  | 0.077025  |
| 35 | O | -0.229945 | 2.62533   | -0.066743 | 0.229945  | 2.625336  | -0.066768 |
| 36 | O | 1.856613  | -0.472662 | 2.486941  | -1.856671 | -0.472545 | 2.486943  |
| 37 | O | 2.014499  | -0.746227 | -2.089415 | -2.014441 | -0.746332 | -2.089404 |

---



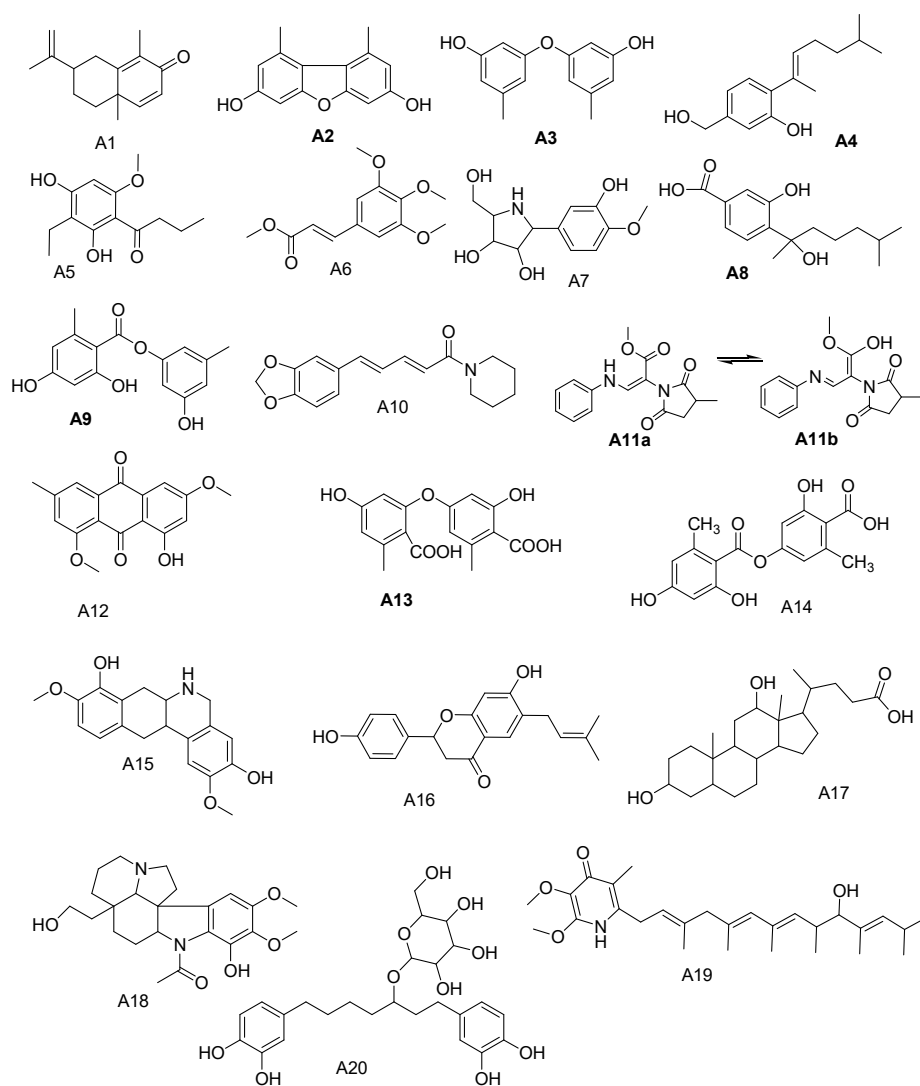

Figure S11 Total of 20 features induced only after the CER were identified by the combination of the computational approach.

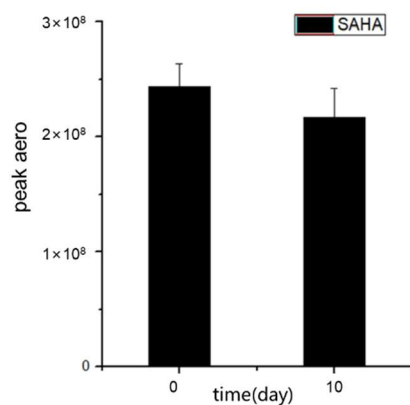

Figure S12 The content of SAHA before and after fermentation.

Table S4. Activities of newly induced compounds against nematode.

|     | IC <sub>50</sub> ( $\mu$ M) |
|-----|-----------------------------|
|     | nematode                    |
| A3  | 50                          |
| A4  | >100                        |
| A9  | >100                        |
| A11 | >100                        |
| A13 | >100                        |

Table S5. Binding Glide Scores of A11a and A11b on the SHP1.

|      | Docking glide score (Kcal/mol) |            |        |        |
|------|--------------------------------|------------|--------|--------|
|      | site                           | site score | A11a   | A11b   |
| SHP1 | 2 (active site)                | 0.927      | -4.054 | -4.815 |
|      | 1                              | 0.903      | -3.703 | -4.456 |
|      | 3                              | 0.706      | -3.600 | -5.586 |

a.

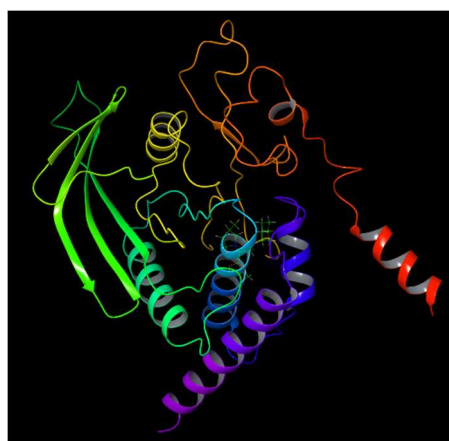

b.

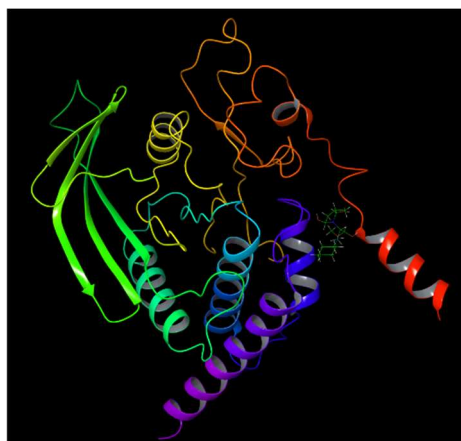

c.

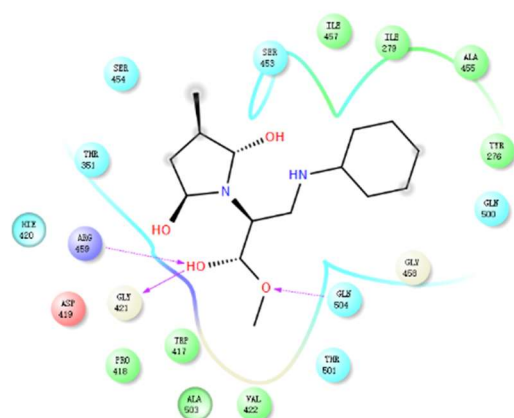

d.

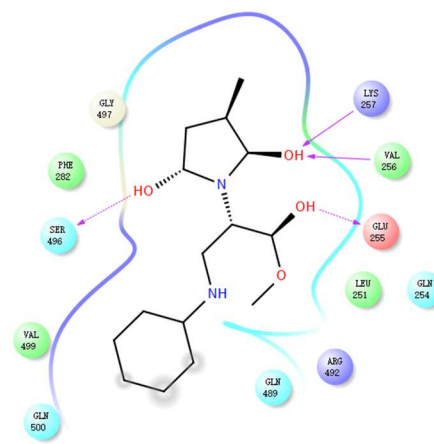

Figure S13. Representation of the binding mode of compounds A11a (a, c) and A11b (b, d) in the active site and the inactive site of SHP1.

Table S6. Physicochemical descriptors as well as to predict ADME parameters, pharmacokinetic properties by SwissADME of detected compounds.

| Lipophilicity characteristics |        |       |        |       |       |                         |                    |       |                       | Water solubility characteristics |                       |                  |                 | Pharmacokinetics parameters and bioavailability |          |       | Drug-likeness rules score |      |        |  |  |
|-------------------------------|--------|-------|--------|-------|-------|-------------------------|--------------------|-------|-----------------------|----------------------------------|-----------------------|------------------|-----------------|-------------------------------------------------|----------|-------|---------------------------|------|--------|--|--|
| Molecule                      | MW     | iLOGP | XLOGP3 | WLOGP | MLOGP | Silicos<br>-IT<br>Log P | Consensus<br>Log P | Log S | Solubility<br>(mg/ml) | Solubility<br>(mol/l)            | Class                 | GI<br>absorption | BBB<br>permeant | Bioavailabi<br>lity Score                       | Lipinski | Ghose | Veber                     | Egan | Muegge |  |  |
| A3                            | 230.26 | 2.35  | 3.47   | 3.51  | 2.6   | 3.03                    | 2.99               | -4.2  | 1.47E-02              | 6.38E-05                         | Moderately<br>soluble | High             | Yes             | 0.55                                            | 0        | 0     | 0                         | 0    | 0      |  |  |
| A4                            | 234.33 | 3.26  | 4.08   | 3.57  | 3.11  | 3.76                    | 3.56               | -4.63 | 5.43E-03              | 2.32E-05                         | Moderately<br>soluble | High             | Yes             | 0.55                                            | 0        | 0     | 0                         | 0    | 0      |  |  |
| A9                            | 274.27 | 2.11  | 3.55   | 2.64  | 2.18  | 2.46                    | 2.59               | -5.06 | 2.38E-03              | 8.67E-06                         | Moderately<br>soluble | High             | No              | 0.55                                            | 0        | 0     | 0                         | 0    | 0      |  |  |
| A11                           | 288.3  | 2.43  | 2.01   | 0.94  | 0.72  | 1.13                    | 1.44               | -3.23 | 1.71E-01              | 5.93E-04                         | Soluble               | High             | No              | 0.55                                            | 0        | 0     | 0                         | 0    | 0      |  |  |
| A13                           | 318.28 | 0.2   | 3.07   | 2.9   | 1.55  | 1.92                    | 1.93               | -5.35 | 1.43E-03              | 4.50E-06                         | Moderately<br>soluble | High             | No              | 0.56                                            | 0        | 0     | 0                         | 0    | 0      |  |  |

## Compounds information

sydowimide A (**A11**): yellow oil; HRESIMS  $m/z$  289.1185  $[M+H]^+$  and 287.1034  $[M-H]^-$  (calcd for  $C_{15}H_{16}O_4N_2$ , 288.1110);  $^1H$  and  $^{13}C$  NMR as shown in Table 2 and S6-S7;

3,7-dihydroxy-1,9-dimethyldibenzofuran (**A2**): yellow oil; HRESI(+)MS  $m/z$  367.1376  $[M+H]^+$  (calcd for  $C_{14}H_{12}O_3$ , 228.0786).  $^1H$ -NMR (500 MHz, DMSO- $d_6$ ): 1.24 (3H, s), 1.57 (3H, s), 1.96 (3H, s), 2.14 (3H, s), 3.05 (3H, s), 4.27 (1H, s), 4.64 (1H, s), 6.39 (1H, s), 9.52 (1H, s), 10.26 (1H, s), 12.33 (1H, s).  $^{13}C$ -NMR (125.76 MHz, DMSO- $d_6$ ): 7.61, 9.56, 13.79, 19.59, 50.02, 70.18, 80.43, 83.31, 107.09, 110.95, 114.20, 119.44, 132.91, 154.78, 156.43, 169.11, 171.96, 192.7.

diorcinol (**A3**): yellow oil; HRESIMS  $m/z$  231.1015  $[M+H]^+$  (calcd for  $C_{14}H_{14}O_3$ , 230.0943),  $^1H$ -NMR (500 MHz,  $CD_3OD$ ): 6.44 (1H, s), 6.31 (1H, s), 6.29 (1H, d), 6.24 (1H, t), 6.16 (1H, d), 2.46 (3H, s), 2.22 (1H, s).  $^{13}C$ -NMR (125.76 MHz,  $CD_3OD$ ): 21.50, 24.17, 103.60, 105.75, 108.37, 113.12, 113.30, 113.56, 142.06, 145.30, 157.34, 159.84, 163.68, 166.33, 174.67.

aspergillusene A (**A4**): yellow oil; HRESIMS  $m/z$  235.1692  $[M+H]^+$  (calcd for  $C_{15}H_{22}O_2$ , 234.1620),  $^1H$ -NMR (500 MHz,  $CD_3OD$ ): 6.96 (1H, d), 6.74 (1H, m), 6.74 (1H, m), 5.39 (1H, t), 4.49 (2H, s), 2.15 (2H, m), 1.94 (3H, s), 1.62 (1H, m), 1.31 (2H, dt), 0.93 (3H, d), 0.93 (3H, d).  $^{13}C$ -NMR (125.76 MHz,  $CD_3OD$ ): 17.22, 23.00, 27.21, 28.92, 39.97, 65.03, 114.96, 119.05, 130.42, 130.79, 133.26, 135.53, 142.24, 155.24.

Sydonic acid (**A8**): Colorless needles; ESI-MS  $m/z$ : 267.1586  $[M+H]^+$  (calcd for  $C_{15}H_{22}O_4$ , 266.1518);  $^1H$ -NMR (500 MHz,  $CD_3OD$ ): 0.80 (3H, s), 0.82 (3H, s), 1.13 (2H, m), 1.29 (1H, m), 1.34 (1H, m), 1.47 (1H, m), 1.59 (3H, s), 1.77 (1H, ddd), 1.94 (1H, ddd), 7.25 (1H, d, 7.9), 7.37 (1H, d, 7.6), 7.44 (1H, dd).  $^{13}C$ -NMR (125.76 MHz,  $CD_3OD$ ): 22.83, 22.89, 22.96, 28.86, 28.95, 40.42, 43.68, 78.0, 118.67, 121.52, 127.74, 131.64, 137.91, 156.96, 169.88.

lecanorin (**A9**): yellow oil; HRESIMS  $m/z$  275.0912  $[M+H]^+$  (calcd for  $C_{15}H_{14}O_5$ , 274.0841),  $^1H$ -NMR (500 MHz,  $CD_3OD$ ): 6.44 (1H, s), 6.31 (1H, s), 6.29 (1H, d), 6.24 (1H, t), 6.16 (1H, d), 2.46 (3H, s), 2.22 (1H, s).  $^{13}C$ -NMR (125.76 MHz,  $CD_3OD$ ): 21.50, 24.17, 103.60, 105.75, 108.37, 113.12, 113.30, 113.56, 142.06, 145.30, 157.34, 159.84, 163.68, 166.33, 174.67.

diorcinolic acid (**A13**): yellow oil; HRESIMS  $m/z$  319.0812  $[M+H]^+$  (calcd for  $C_{16}H_{14}O_7$ , 318.0740),  $^1H$ -NMR (500 MHz,  $CD_3OD$ ): 6.46 (1H, d), 6.25 (1H, d), 6.20 (1H, d), 6.14 (1H, d), 3.26 (3H, s), 2.42 (3H, s), 2.26 (3H, s).  $^{13}C$ -NMR (125.76 MHz,  $CD_3OD$ ): 20.2, 24.09, 103.81, 106.42, 108.97, 113.25, 114.89, 120.13, 140.49, 145.2, 155.04, 160.77, 163.25, 166.13, 170.84, 174.67.

suberanilic acid (**S2**): light yellow powder; HRESIMS  $m/z$  250.144  $[M+H]^+$  (calcd for  $C_{14}H_{19}NO_3$ , 249.1365),  $^1H$ -NMR (500 MHz,  $CD_3OD$ ): 7.53 (2H, d), 7.29 (2H, t), 7.07 (1H, t), 2.36 (2H, t), 2.28 (2H, t), 1.71 (2H, dd), 1.63 (2H, m), 1.40 (4H, m).  $^{13}C$ -NMR (150.81 MHz,  $CD_3OD$ ): 26.10, 26.78, 29.98, 30.01, 35.28, 37.9, 121.26, 125.09, 129.74, 139.89, 174.63, 178.17.

3-hydroxybenzyl 8-oxo-8-(phenylamino)octanoate (**S3**): light yellow powder; HRESIMS  $m/z$  249.160  $[M+H]^+$  (calcd for  $C_{14}H_{20}N_2O_2$ , 248.1525),  $^1H$ -NMR (500 MHz,  $CD_3OD$ ): 7.54 (2H, d), 7.30 (2H, t), 7.08 (1H, t), 2.37 (2H, t), 2.20 (2H, m), 1.71 (2H, m), 1.64 (2H, m), 1.41 (4H, m).  $^{13}C$ -NMR (150.81 MHz,  $CD_3OD$ ): 26.73, 26.76, 29.98, 36.42, 37.88, 121.25, 125.10, 129.75, 139.90, 174.52, 179.22.
